# Supplementary material for: Stability of ACE2 Peptide Mimetics and Their Implications on the Application for SARS-CoV2 Detection
Source: MDPI journal article supplement (doi:10.3390/bios13040473), 2023-04-13
Supplement: s1 [file s1]

*Supporting Information*

# Stability of ACE2 Peptide Mimetics and Their Implications on the Application for SARS-CoV2 Detection

**Paula A. Santana**<sup>1</sup>, **Claudio A. Álvarez**<sup>2,3,\*</sup>, **Santiago Valenzuela**<sup>1</sup>, **Alberto Manchego**<sup>4</sup>, **Fanny Guzmán**<sup>5</sup>, **Cristian Tirapegui**<sup>1</sup> and **Manuel Ahumada**<sup>6,7,\*</sup>

<sup>1</sup> Instituto de Ciencias Químicas Aplicadas, Facultad de Ingeniería, Universidad Autónoma de Chile, el Llano Subercaseaux 2801, San Miguel, Santiago 8910272, Chile

<sup>2</sup> Laboratorio de Fisiología y Genética Marina, Centro de Estudios Avanzados en Zonas Áridas, Larrondo 1281, Coquimbo 1780000, Chile

<sup>3</sup> Facultad de Ciencias del Mar, Universidad Católica del Norte, Larrondo 1281, Coquimbo 1780000, Chile

<sup>4</sup> Laboratorio de Microbiología, Facultad de Medicina Veterinaria y Parasitología Veterinaria, Universidad Nacional Mayor de San Marcos, Lima 3673, Peru

<sup>5</sup> Núcleo Biotecnología Curauma, Pontificia Universidad Católica de Valparaíso, Valparaíso 2373223, Chile

<sup>6</sup> Escuela de Biotecnología, Facultad de Ciencias, Ingeniería y Tecnología, Universidad Mayor, Camino La Piramide 5750, Huechuraba, Santiago 8910272, Chile

<sup>7</sup> Centro de Nanotecnología Aplicada, Facultad de Ciencias, Ingeniería y Tecnología, Universidad Mayor, Camino La Piramide 5750, Huechuraba, Santiago 8910272, Chile

\* Correspondence: claudio.alvarez@ceaza.cl (C.A.Á.); manuel.ahumada@umayor.cl (M.A.)

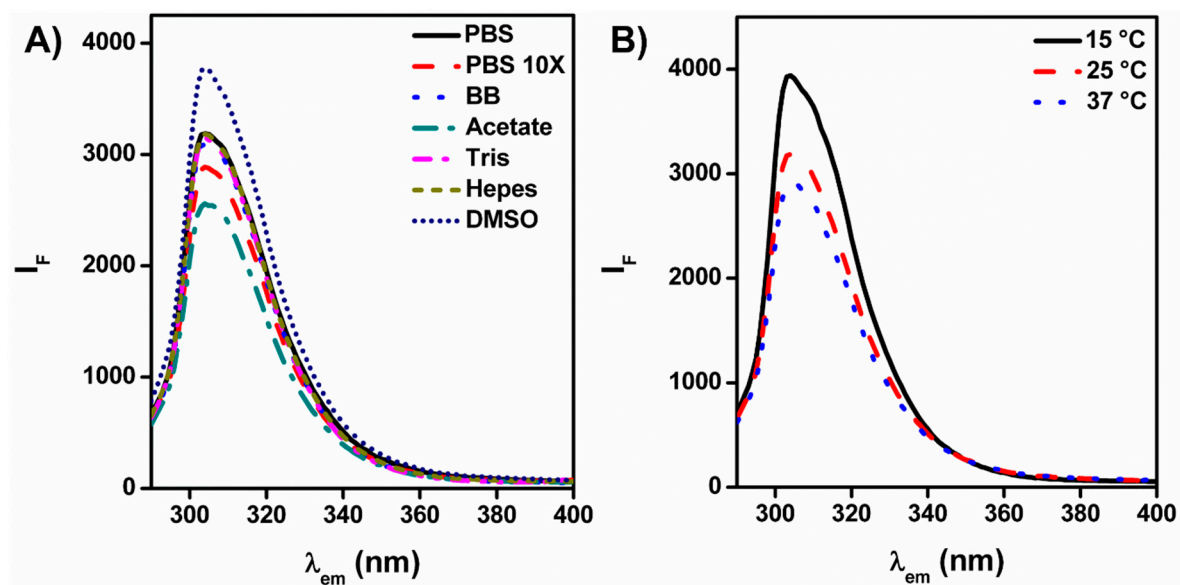

**Figure S1.** ACE2 peptide's tyrosine fluorescence emissions spectra under different conditions. **(A)** Peptide Tyr fluorescence emissions when exposed to phosphate buffer saline (PBS; pH 7), PBS 10x (pH 7), bicarbonate (BB; pH 8), acetate (pH 5), Tris-HCl (pH 8), Hepes (pH 7), and DMSO at 10 % v/v. **(B)** Peptide Tyr fluorescence emission when exposed to PBS (pH 7) at three different temperatures. Similar behavior was observed for the other conditions. Samples were excited at 280 nm.
